# Supplementary material for: Estimating Age-Specific Immunity and Force of Infection of Varicella Zoster Virus in Norway Using Mixture Models
Source: PubMed Central journal article supplement (PMC5045180; doi:10.1371/journal.pone.0163636), 2016-09-30
Supplement: pone.0163636.s001.pdf [file pone.0163636.s001.pdf]

**S1 Table Estimate of the force of infection in Norway.** Posterior mean of the FOI by age, with 95% credible intervals.

| <b>Age</b> | <b>FOI</b> | <b>95% CI</b> |
|------------|------------|---------------|
| 1y         | 0.104      | 0.067, 0.149  |
| 2y         | 0.174      | 0.110, 0.238  |
| 3y         | 0.263      | 0.160, 0.374  |
| 4y         | 0.233      | 0.121, 0.357  |
| 5y         | 0.263      | 0.108, 0.437  |
| 6y         | 0.139      | 0.030, 0.290  |
| 7y         | 0.116      | 0.022, 0.246  |
| 8y         | 0.091      | 0.013, 0.221  |
| 9y         | 0.053      | 0.007, 0.137  |
| 10-14y     | 0.048      | 0.006, 0.125  |
| 15-19y     | 0.042      | 0.005, 0.113  |
| 20-24y     | 0.039      | 0.005, 0.107  |
| 25-29y     | 0.044      | 0.005, 0.120  |
| 30-34y     | 0.052      | 0.007, 0.143  |
| 35-39y     | 0.053      | 0.007, 0.146  |
| 40-44y     | 0.057      | 0.007, 0.156  |
| 45-49y     | 0.057      | 0.007, 0.159  |
| 50-59y     | 0.044      | 0.005, 0.134  |
| >60y       | 0.025      | 0.003, 0.080  |
